# Supplementary material for: Interaction of water with oligo(ethylene glycol) terminated monolayers: wetting versus hydration
Source: Royal Society of Chemistry journal article supplement (doi:10.1039/d0cp00906g), 2020-01-01
Supplement: d0cp00906g1.pdf [file d0cp00906g1.pdf]

Electronic supplementary information

**Interaction of water with oligo(ethylene glycol) terminated monolayers:  
wetting versus hydration**

Mustafa Sayin,<sup>1</sup> Alexei Nefedov,<sup>2</sup> and Michael Zharnikov<sup>1,\*</sup>

<sup>1</sup>*Applied Physical Chemistry, Heidelberg University, Im Neuenheimer Feld 253, 69120  
Heidelberg, Germany*

<sup>2</sup>*Institute of Functional Interfaces, Karlsruhe Institute of Technology (KIT), Hermann-von-  
Helmholtz-Platz 1, 76344 Eggenstein-Leopoldshafen, Germany*

## 1. Integral TPD signal

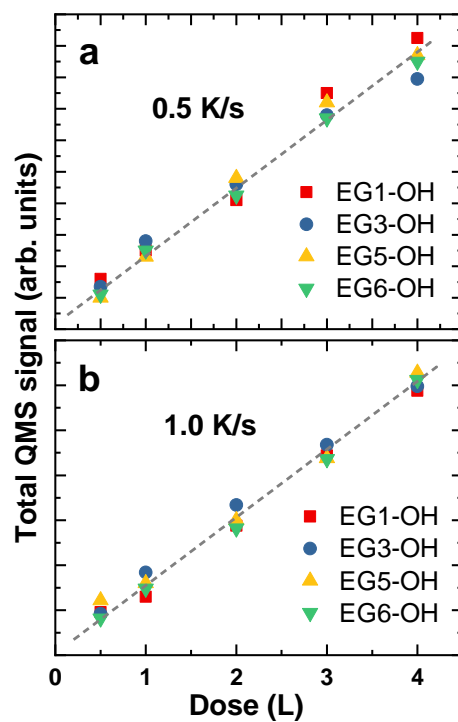

**Figure S1.** Integral TPD signal for the EGN-OH ( $n = 6, 5, 3,$  and  $1$ ) SAMs as a function of the  $D_2O$  dose. The heating rate was set to  $0.5$  K/s (a) and  $1.0$  K/s (b). The legend is given in the figure. The gray dashed lines are guides for the eyes, to underline the linearity of the coverage-vs-dose dependence.

## 2. Additional TPD data

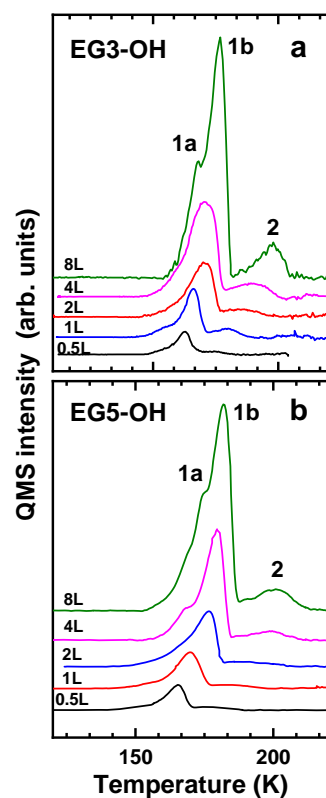

**Figure S2.** TPD traces for various doses of D<sub>2</sub>O deposited at ~110 K onto the surface of the EG3-OH (a) and EG5-OH (b) SAMs. The heating rate was set to 0.5 K/s. The D<sub>2</sub>O doses are marked at the respective curves. Individual desorption peaks are marked by numbers (see the main manuscript for details).

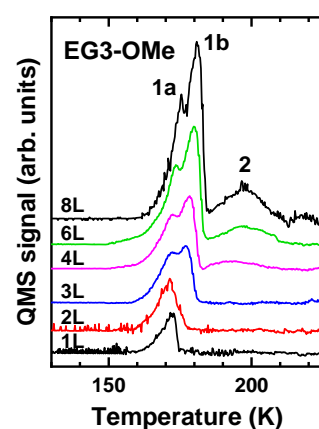

**Figure S3.** TPD traces for various doses of D<sub>2</sub>O deposited at ~110 K onto the surface of the EG3-OMe SAMs. The heating rate was set to 0.3 K/s. The D<sub>2</sub>O doses are marked at the respective curves. Individual desorption peaks are marked by numbers (see the main manuscript for details).
